# Supplementary material for: Maternal vaginal microbiome composition does not affect development of the infant gut microbiome in early life
Source: PubMed Central journal article supplement (PMC10097898; doi:10.3389/fcimb.2023.1144254), 2023-03-30
Supplement: Image_1.pdf [file Image_1.pdf]

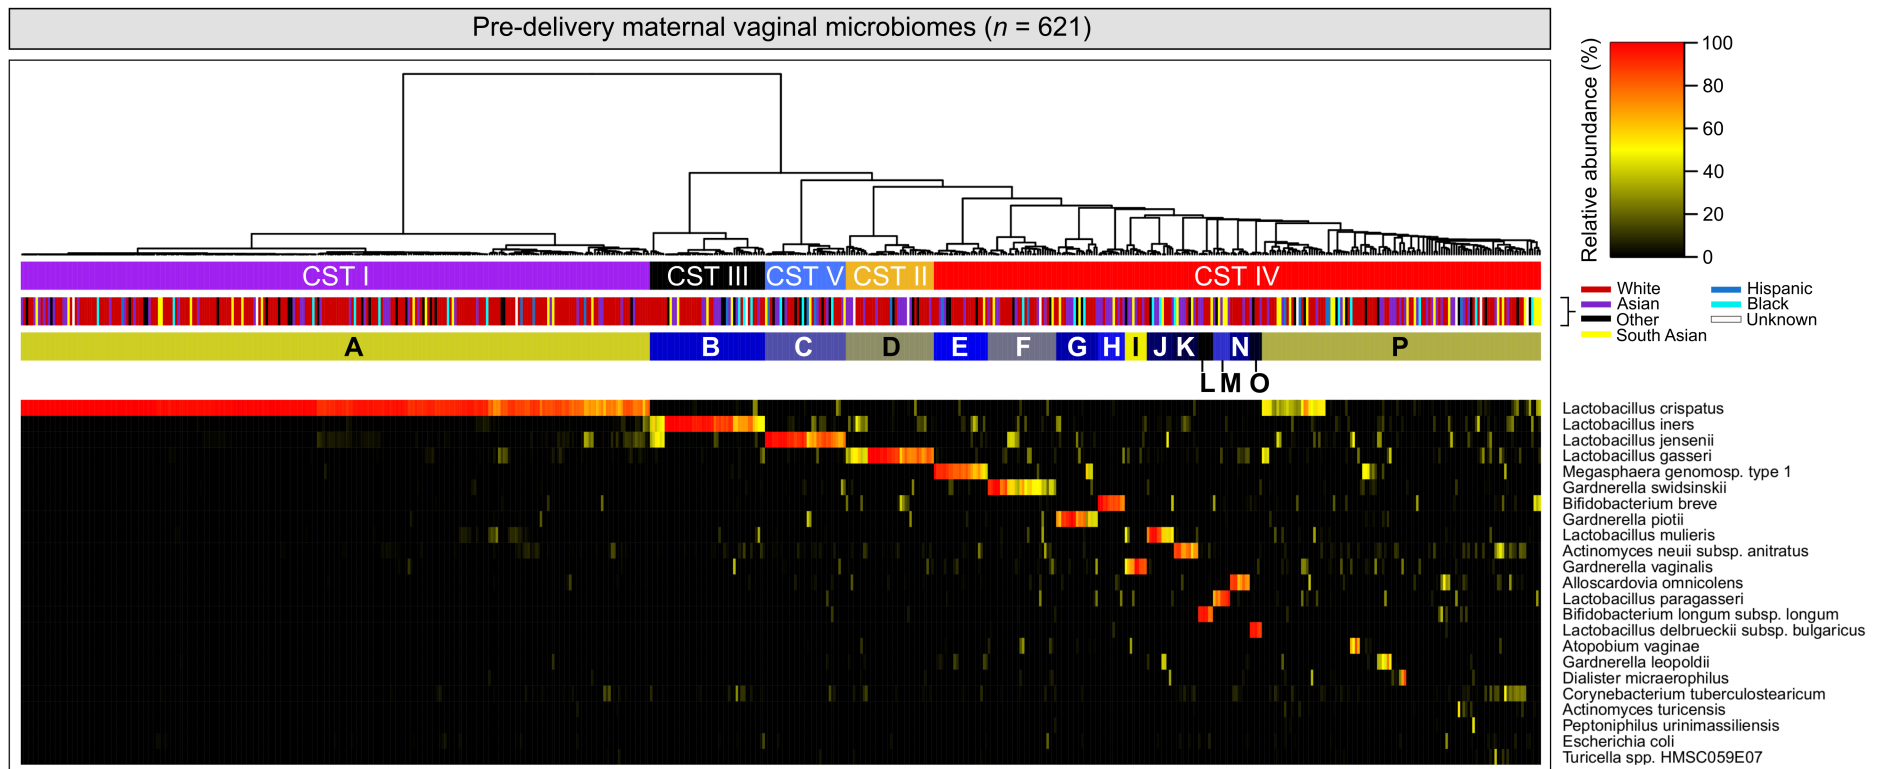

**Supplementary Figure S1 Maternal vaginal microbiomes are dominated by one of several species of *Lactobacillus* or various anaerobic species:** Hierarchical clustering of *cpn60* vaginal microbiomes constructed from Euclidean distance matrices of proportional abundance data. Only select taxa shown. Top colour bar represents the five 'canonical' vaginal community state types (CSTs: I = *L. crispatus*, II = *L. gasseri*, III = *L. iners*, IV = various anaerobic species, V = *L. jensenii*), middle colour bar represents maternal ethnicity, bottom colour bar represents clusters defined by nbClust (left to right: Cluster A - Cluster P).
