# Supplementary material for: Maternal vaginal microbiome composition does not affect development of the infant gut microbiome in early life
Source: PubMed Central journal article supplement (PMC10097898; doi:10.3389/fcimb.2023.1144254), 2023-03-30
Supplement: Image_2.pdf [file Image_2.pdf]

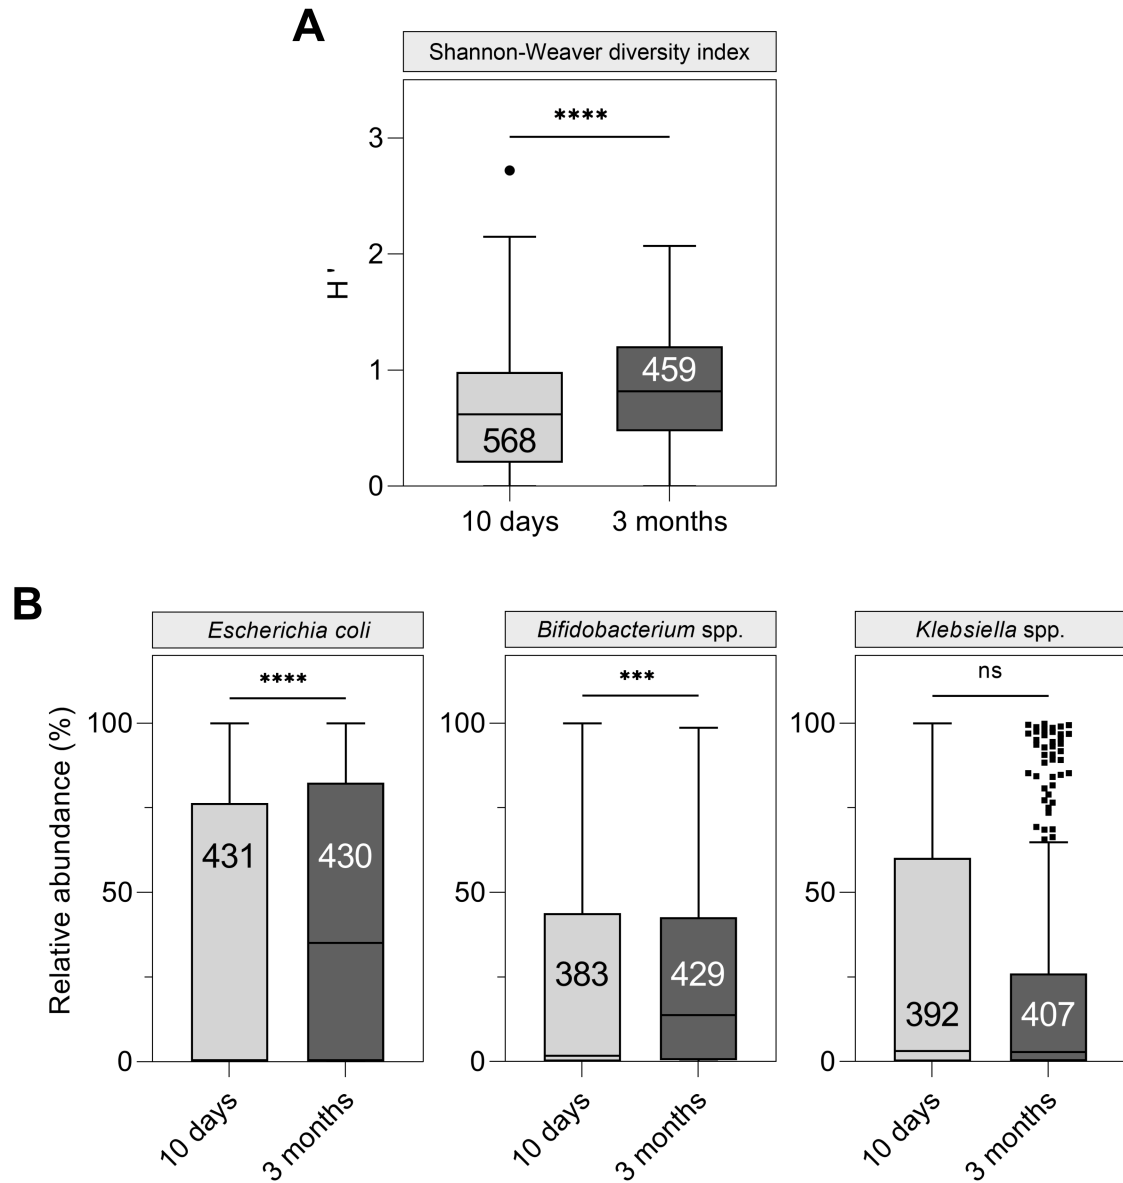

**Supplementary Figure S2 Alpha diversity and relative abundances of *E. coli* and *Bifidobacterium* spp. in infant stool microbiomes increase over time:** (A) Alpha diversity, measured by Shannon-Weaver index ( $H'$ ), was calculated for infant stool microbiomes at 10-days and 3-months of life (bars indicate 1.5x IQR). (B) Boxplots of relative abundances of the most commonly detected taxa in infant stool microbiomes across time. Horizontal bar indicates median, Whiskers indicate 1.5x IQR. White text indicates number of samples. \*\*\* =  $P < 0.001$ , \*\*\*\* =  $P < 0.0001$ , ns = not significant (Mann-Whitney U).
