# Supplementary material for: Maternal vaginal microbiome composition does not affect development of the infant gut microbiome in early life
Source: PubMed Central journal article supplement (PMC10097898; doi:10.3389/fcimb.2023.1144254), 2023-03-30
Supplement: Image_3.pdf [file Image_3.pdf]

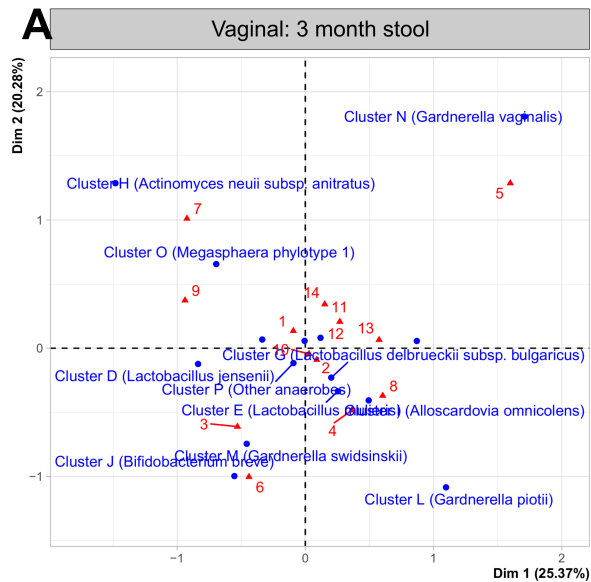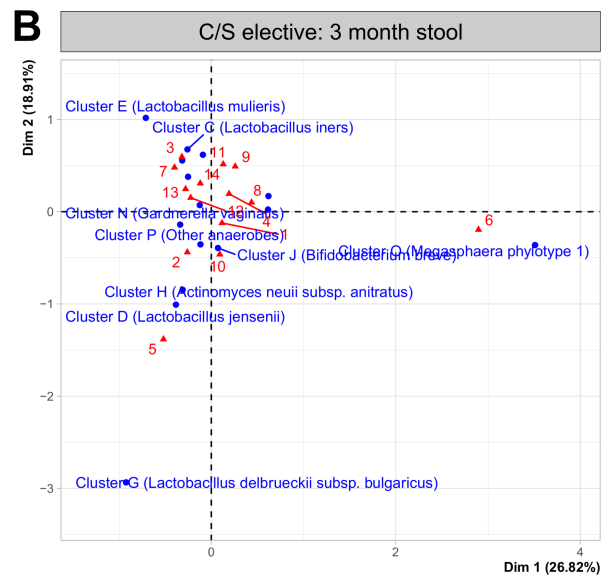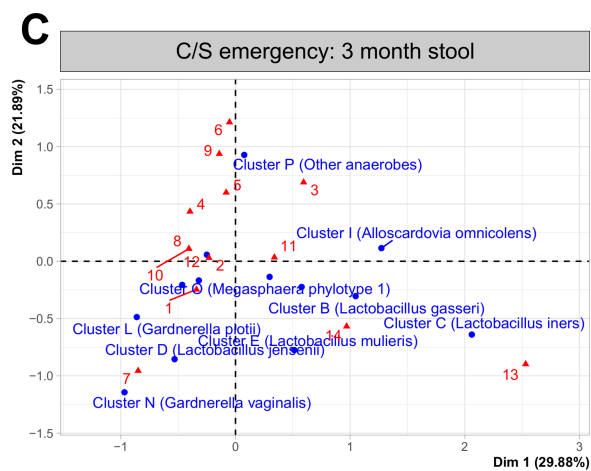

**D**

| Time     | P (Fisher's exact test) |               |         |
|----------|-------------------------|---------------|---------|
|          | Elective C/S            | Emergency C/S | Vaginal |
| 10 days  | 0.254                   | 0.356         | 0.224   |
| 3 months | 0.462                   | 0.527         | 0.746   |

**Supplementary Figure S3 Distribution of maternal vaginal microbiomes among infant stool clusters is not affected by delivery mode:** Correspondence analysis of **maternal vaginal microbiomes** and **infant stool clusters** from 3-month-old infant stool microbiomes, grouped by vaginal delivery (**A**), elective caesarean (**B**) or emergency caesarean (**C**). *P* values from Fisher's exact test examining differences in the distribution of maternal vaginal microbiome clusters among infant stool microbiome clusters (**D**) were corrected for multiple testing. Results are shown for analyses at 10 days and 3 months of life and stratified by delivery mode.
