# Supplementary material for: Maternal vaginal microbiome composition does not affect development of the infant gut microbiome in early life
Source: PubMed Central journal article supplement (PMC10097898; doi:10.3389/fcimb.2023.1144254), 2023-03-30
Supplement: Image_4.pdf [file Image_4.pdf]

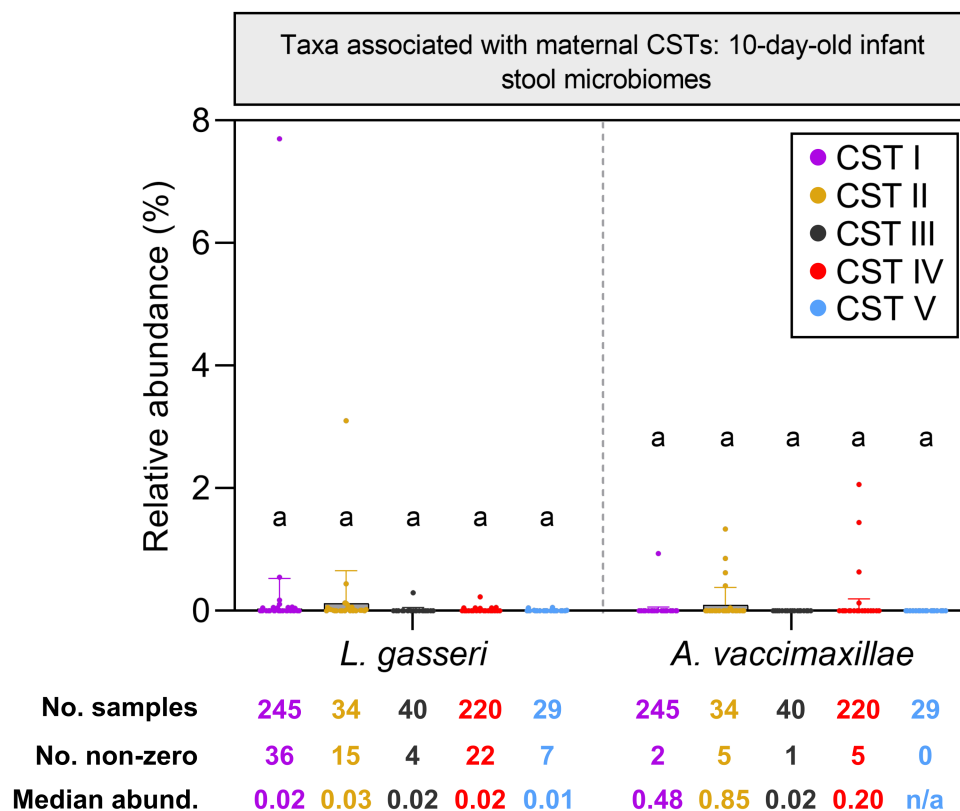

**Supplementary Figure S4 Significant associations of specific taxa with CST II are not observed when comparing relative abundances in infant stool microbiomes:** Relative abundances of the two taxa significantly associated with CST II (identified by MaAsLin2) are compared across 10-day-old infant stool microbiomes stratified by maternal CST. Total number of samples per maternal CST group, number of samples with a non-zero relative abundance taxa, and median relative abundance among samples with non-zero abundance are indicated for both taxa. Identical letters indicate no significant difference in median rank of relative abundance between groups (Kruskal-Wallis test,  $P > 0.138$ , all comparisons, adjusted for multiple comparisons)
