# Supplementary material for: Maternal vaginal microbiome composition does not affect development of the infant gut microbiome in early life
Source: PubMed Central journal article supplement (PMC10097898; doi:10.3389/fcimb.2023.1144254), 2023-03-30
Supplement: Image_5.pdf [file Image_5.pdf]

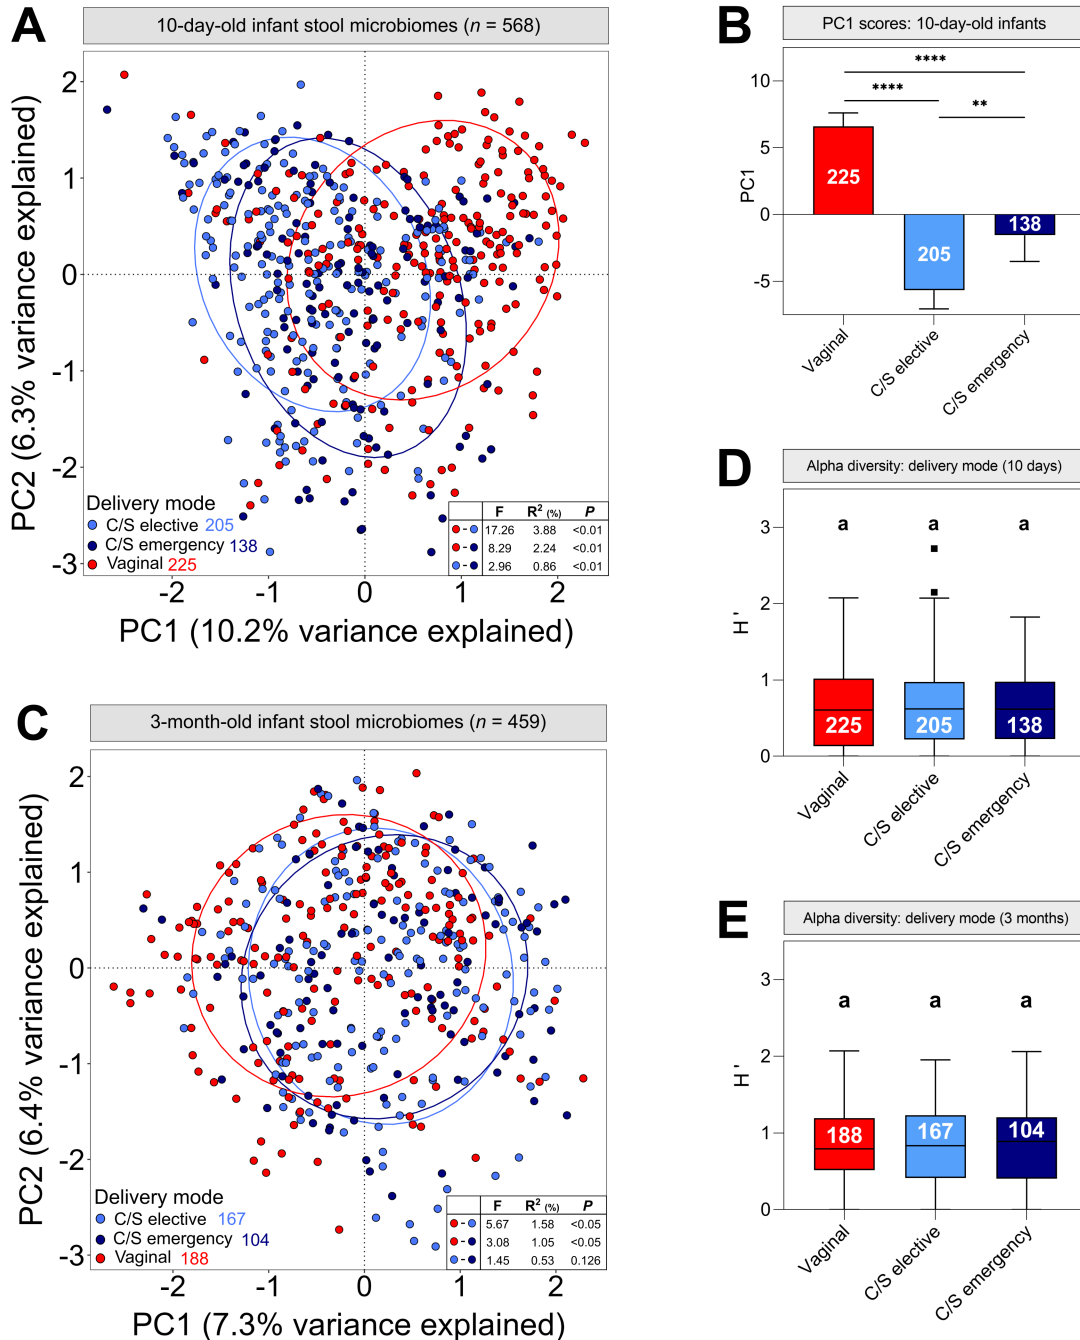

**Supplementary Figure S5 Differences in infant stool microbiome by delivery mode are transient:**

(A) Principal component analysis (PCA) of *cpn60* stool microbiome profiles from 10-day-old infants, grouped by delivery mode (pairwise PERMANOVA,  $P < 0.01$ , all comparisons). (B) Median scores across the first principal component from 10-day-old infant stool microbiomes (bars indicate 95% CI, Kruskal-Wallis test w/ Dunn's correction, \*\* =  $P < 0.01$ , \*\*\*\* =  $P < 0.0001$ ). (C) (PCA) of *cpn60* stool microbiome profiles from 3-month-old infants, grouped by delivery mode (pairwise PERMANOVA,  $P < 0.05$ , vaginal vs. both C/S). (D&E) Alpha diversity of stool microbiomes from 10-day (D) and 3-month (E) -old infants (bars indicate 1.5x IQR). Identical letters indicate no significant difference between groups (Kruskal-Wallis test w/ Dunn's correction).
