# Supplementary material for: Maternal vaginal microbiome composition does not affect development of the infant gut microbiome in early life
Source: PubMed Central journal article supplement (PMC10097898; doi:10.3389/fcimb.2023.1144254), 2023-03-30
Supplement: Image_6.pdf [file Image_6.pdf]

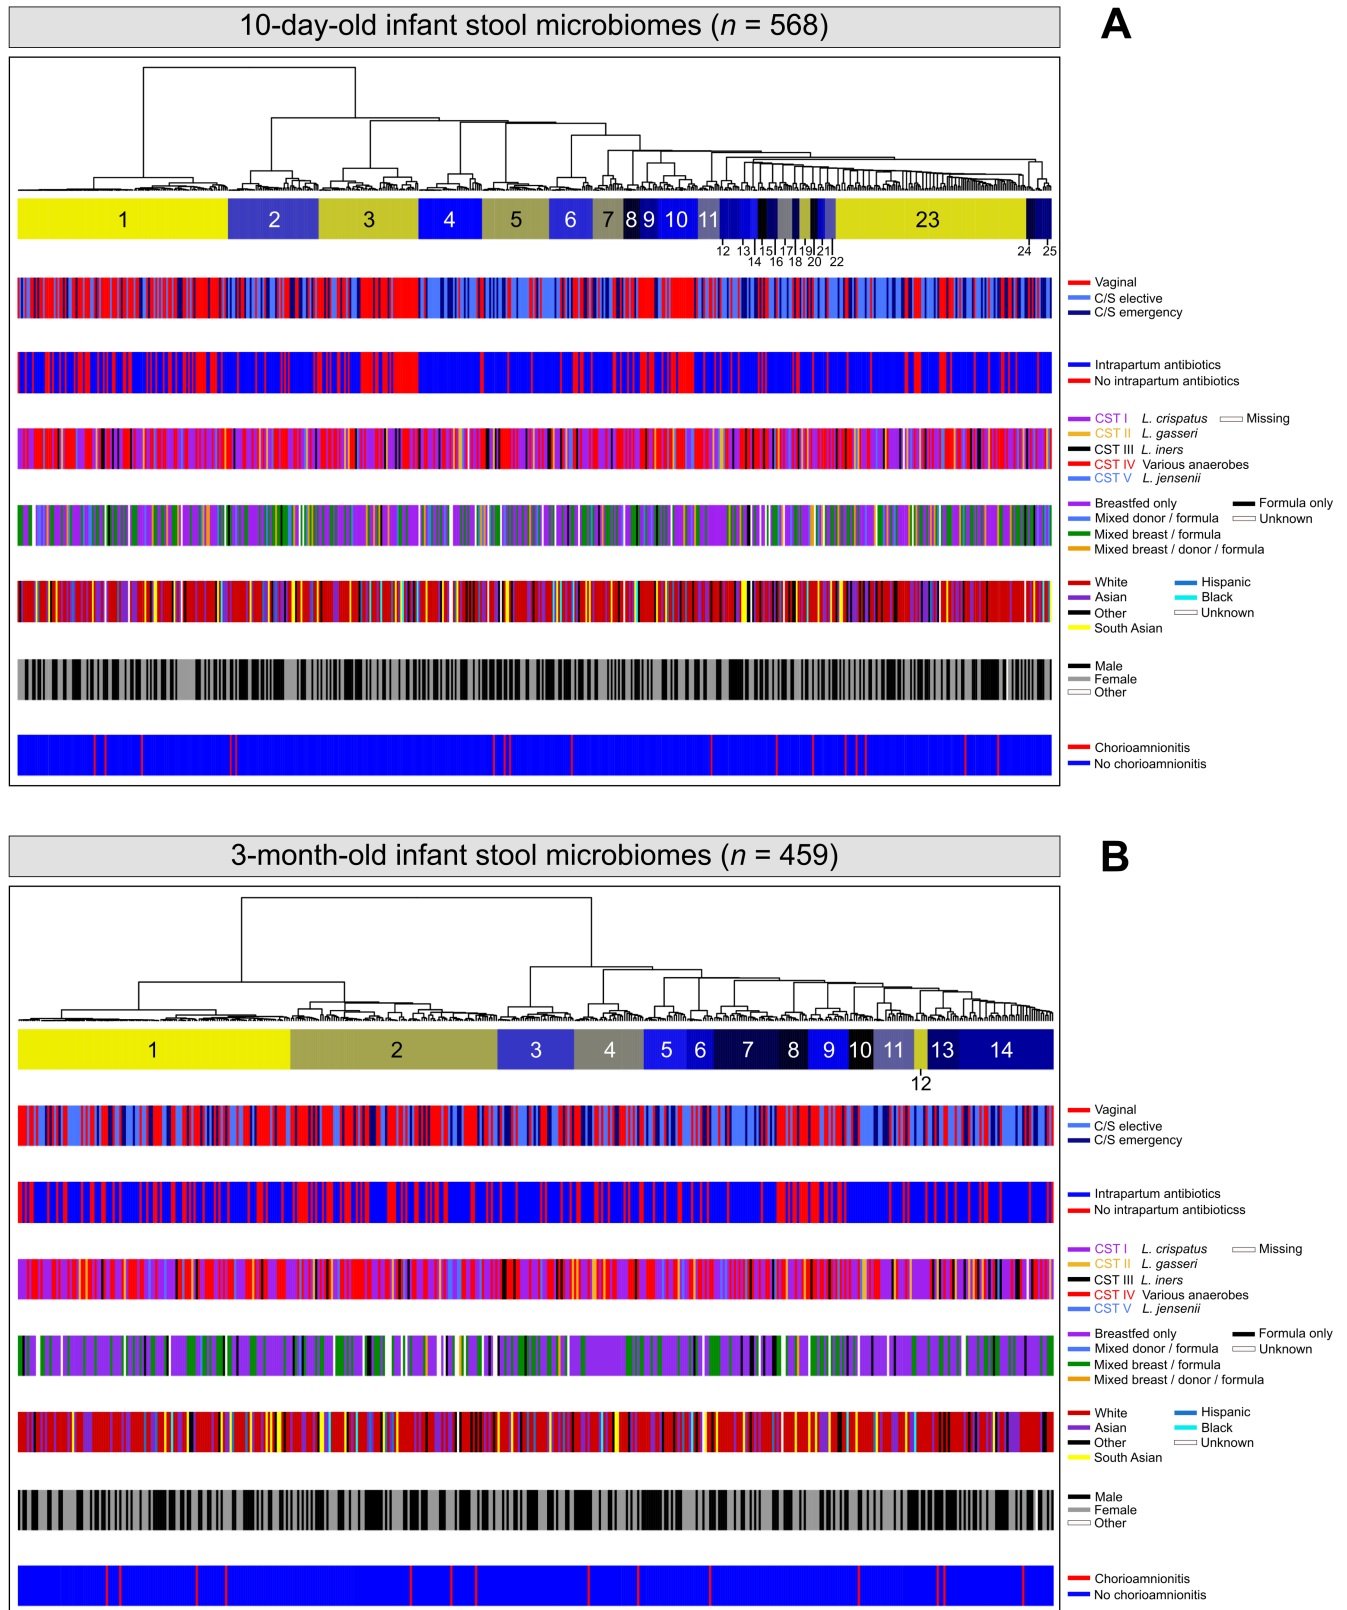

**Supplementary Figure S6 Clinical factors associated with infant stool microbiome clusters:** Hierarchical clustering of cpn60 infant stool microbiome clusters from 10-day (A) and 3-month (B) -old infants were constructed from Euclidean distance matrices of proportional abundance data. Colours bars from top to bottom: microbiome cluster, delivery mode, intrapartum antibiotic administration to mothers at labour and delivery, maternal vaginal CST, breastfeeding modality, maternal ethnicity, infant sex and maternal chorioamnionitis status.
