# Supplementary material for: Maternal vaginal microbiome composition does not affect development of the infant gut microbiome in early life
Source: PubMed Central journal article supplement (PMC10097898; doi:10.3389/fcimb.2023.1144254), 2023-03-30
Supplement: Image_7.pdf [file Image_7.pdf]

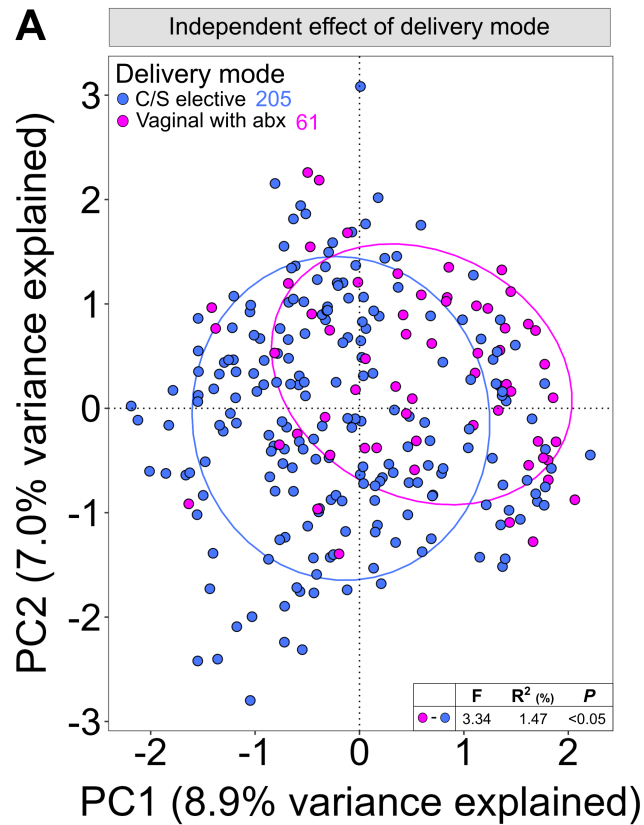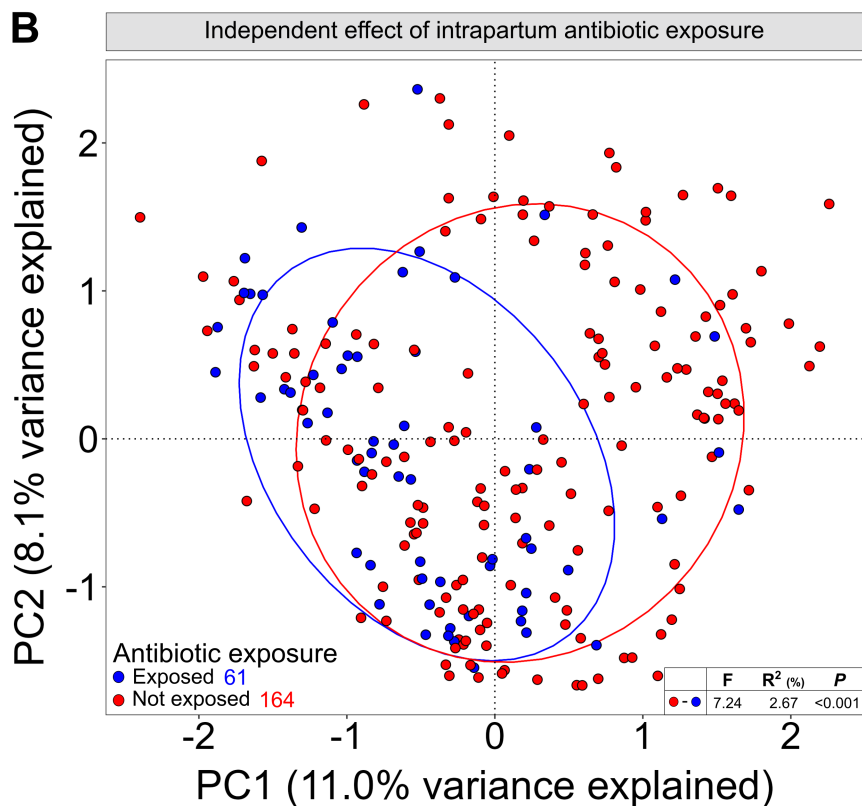

**Supplementary Figure S7 Independent effect of delivery mode and intrapartum antibiotics:**  
**(A)** Principal component analysis of *cpn60* stool microbiome profiles from 10-day-old infants delivered vaginally with antibiotic exposure and by elective C/S ( $F = 3.34$ ,  $R^2 = 1.47$ ,  $P < 0.05$ ). Differences are assumed to be due to delivery mode alone. **(B)** PCA of *cpn60* stool microbiome profiles from 10-day-old vaginally delivered infants with and without intrapartum antibiotic exposure ( $F = 7.24$ ,  $R^2 = 2.67$ ,  $P < 0.001$ ). Differences are assumed to be due to antibiotics alone.
