# Supplementary material for: Maternal vaginal microbiome composition does not affect development of the infant gut microbiome in early life
Source: PubMed Central journal article supplement (PMC10097898; doi:10.3389/fcimb.2023.1144254), 2023-03-30
Supplement: Image_8.pdf [file Image_8.pdf]

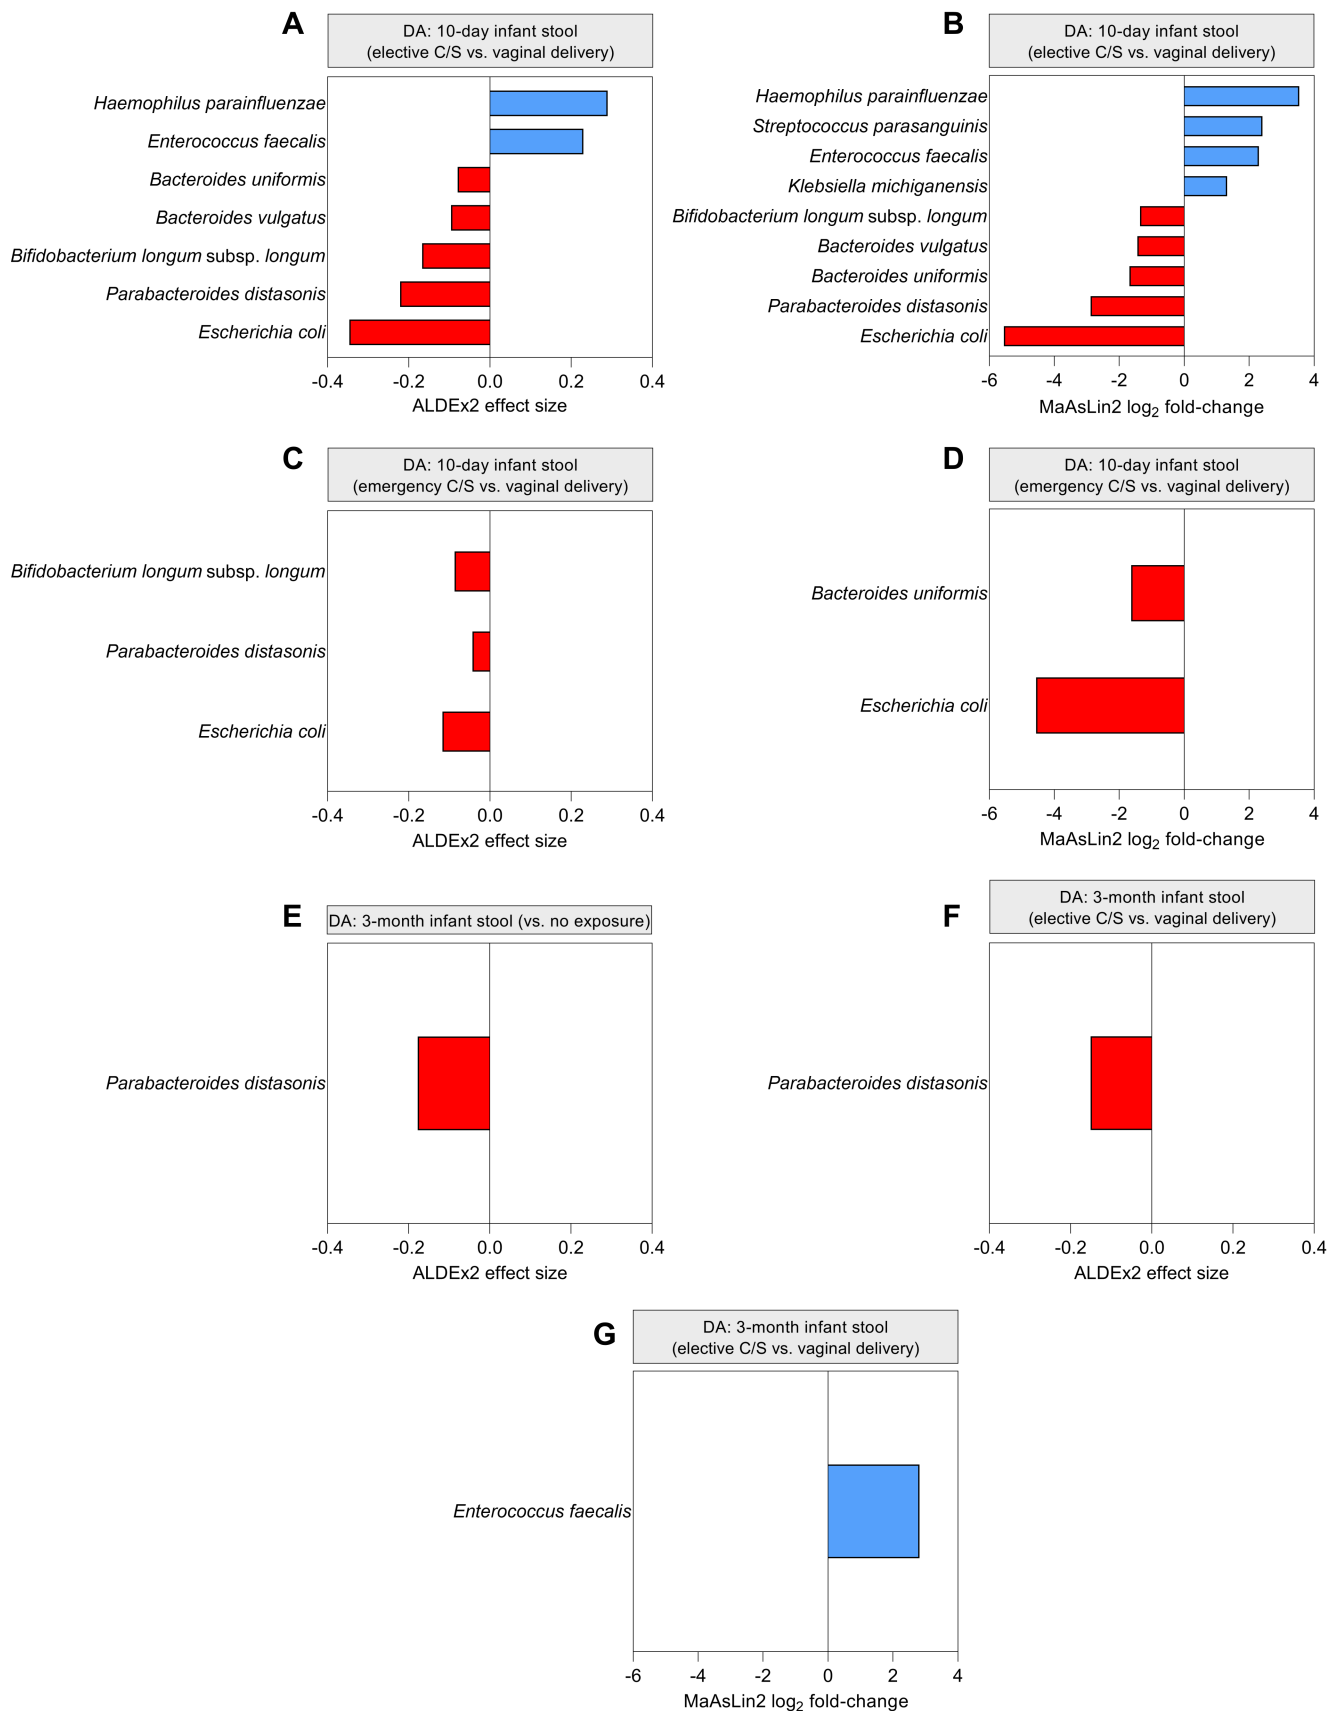

**Supplementary Figure S8 Similar species are differentially abundant when grouping infant stool microbiomes by delivery mode or perinatal antibiotic exposure:** Differentially abundant species in stool microbiomes from 10-day (A-D) and 3-month (E-G) -old infants were defined by ALDEx2 (A,C,E,F) and MaAsLin2 (B,D,G). Infants were grouped either by delivery mode, or by perinatal antibiotic exposure. Red bars indicate overrepresentation in vaginally-delivered or unexposed infants and light blue bars indicate overrepresentation in infants delivered by elective caesarean section.
