# Supplementary material for: Maternal vaginal microbiome composition does not affect development of the infant gut microbiome in early life
Source: PubMed Central journal article supplement (PMC10097898; doi:10.3389/fcimb.2023.1144254), 2023-03-30
Supplement: Image_9.pdf [file Image_9.pdf]

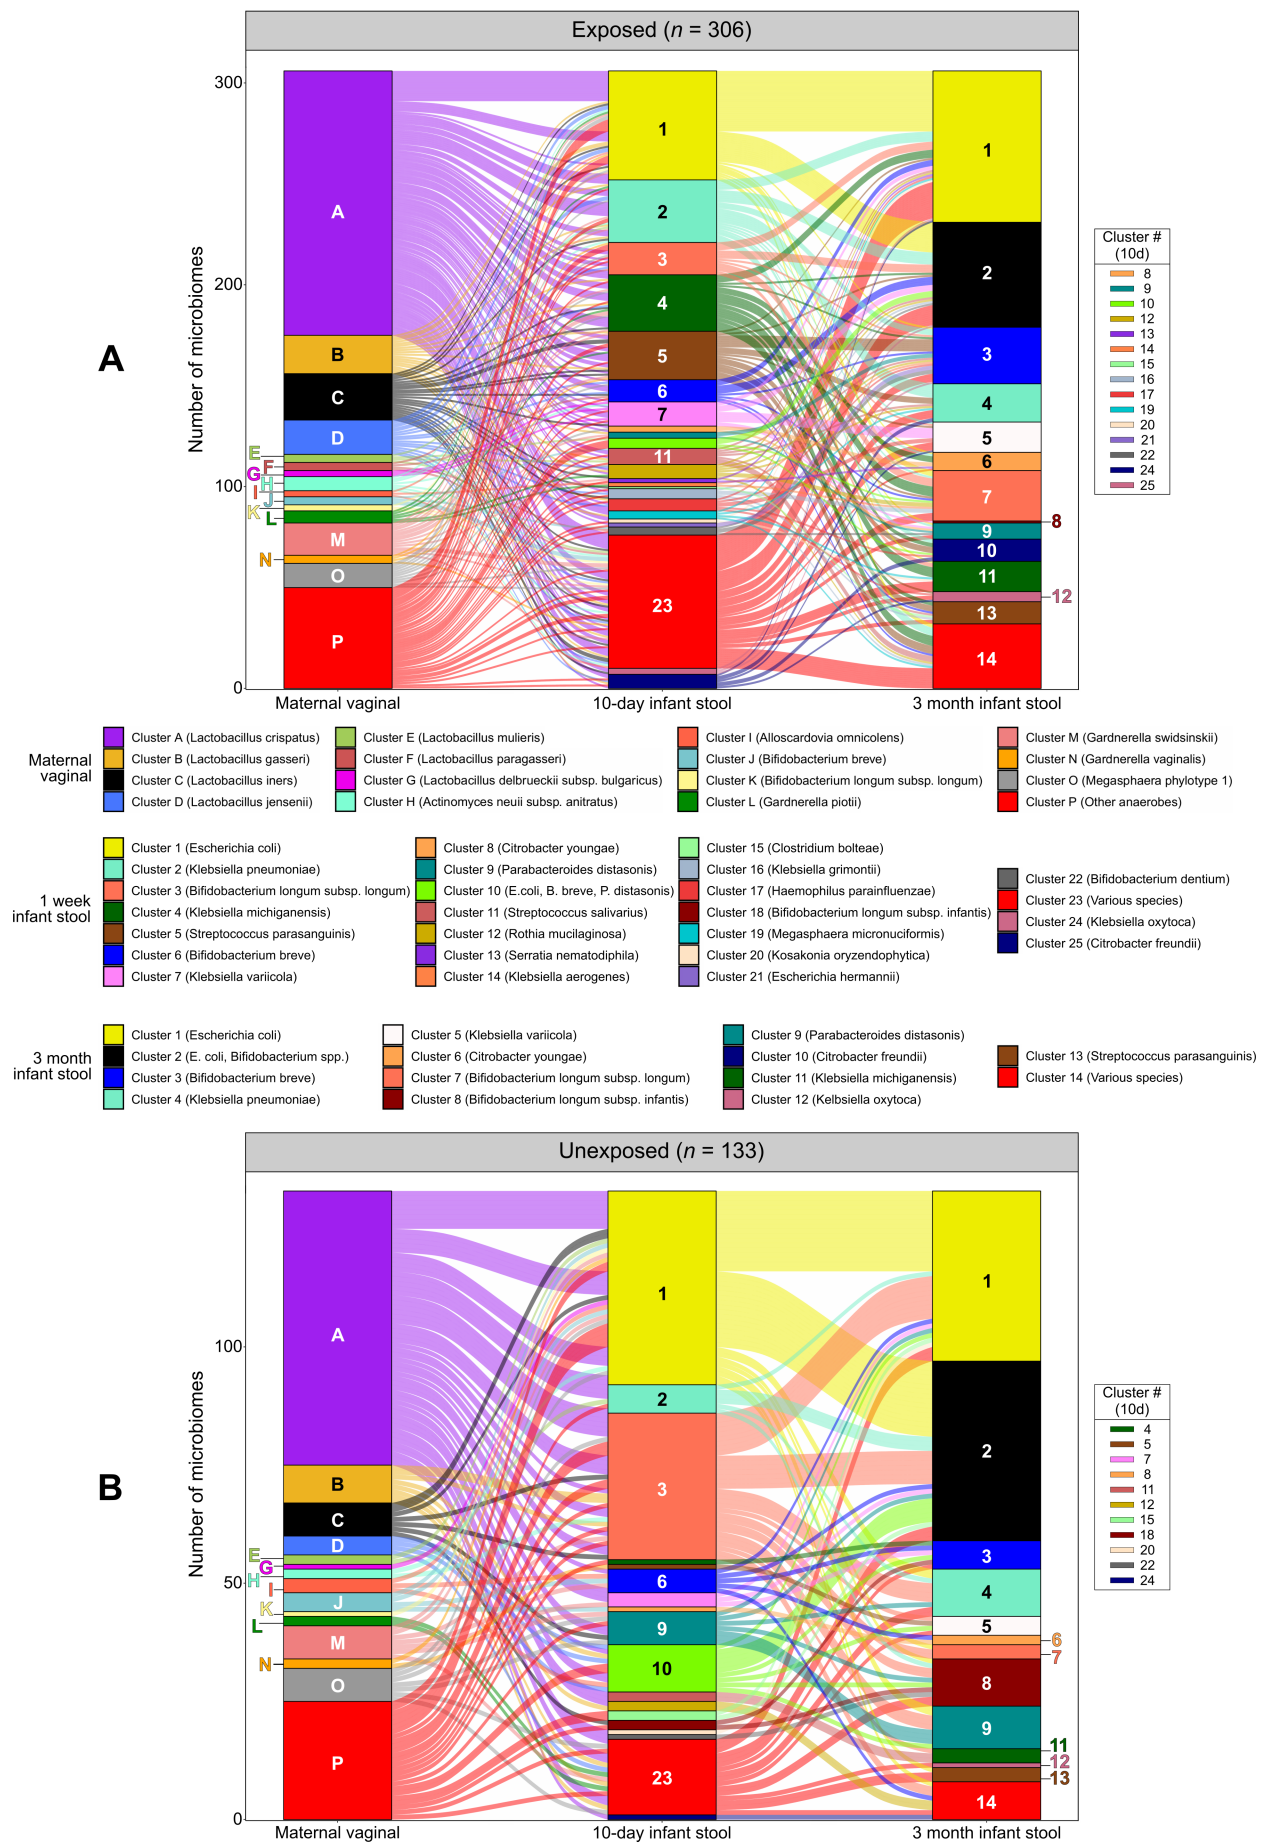

**Supplementary Figure S9 Lack of association between maternal vaginal and infant stool microbiome clusters is not affected by antibiotic exposure:** Alluvial flow of mother-infant dyads from pre-delivery maternal microbiome clusters to 3-month-old infant stool microbiome clusters for infants exposed to antibiotics during labour and delivery (**A**) and those not exposed (**B**). No evident patterns are present and vaginal microbiomes are still distributed among infant stool clusters according to their frequency.
