# Supplementary material for: Maternal vaginal microbiome composition does not affect development of the infant gut microbiome in early life
Source: PubMed Central journal article supplement (PMC10097898; doi:10.3389/fcimb.2023.1144254), 2023-03-30
Supplement: Table_1.pdf [file Table_1.pdf]

**Supplementary Table 1:** Characteristics of the LEGACY study cohort (623 participants and their infants), stratified by mode of delivery. Parentheses indicate row proportions.

|                                                 | Mode of Delivery <sup>a</sup> |                      |                            |                           | P value <sup>b</sup> |
|-------------------------------------------------|-------------------------------|----------------------|----------------------------|---------------------------|----------------------|
|                                                 | Total<br>(n = 623)            | Vaginal<br>(n = 247) | Emergency<br>C/S (n = 155) | Elective<br>C/S (n = 221) |                      |
| <b>Maternal characteristics</b>                 |                               |                      |                            |                           |                      |
| <b>Age at delivery, years</b>                   |                               |                      |                            |                           |                      |
| Mean ± SD                                       | 34.6 ± 4.3                    | 33.8 ± 4.4           | 34.7 ± 4.5                 | 35.4 ± 3.9                | <0.001               |
| 20-29                                           | 73 (11.7%)                    | 42 (17.0%)           | 16 (10.3%)                 | 15 (6.8%)                 | 0.012                |
| 30-39                                           | 470 (75.4%)                   | 181 (73.3%)          | 119 (76.8%)                | 170 (76.9%)               |                      |
| 40-49                                           | 79 (12.7%)                    | 24 (9.7%)            | 20 (12.9%)                 | 35 (15.8%)                |                      |
| 50-59                                           | 1 (0.2%)                      | 0 (0%)               | 0 (0%)                     | 1 (0.5%)                  |                      |
| <b>Ethnicity</b>                                |                               |                      |                            |                           |                      |
| White/Caucasian                                 | 341 (54.7%)                   | 154 (62.3%)          | 71 (45.8%)                 | 116 (52.5%)               | 0.109                |
| Asian                                           | 132 (21.2%)                   | 43 (17.4%)           | 34 (21.9%)                 | 55 (24.9%)                |                      |
| South Asian                                     | 52 (8.3%)                     | 16 (6.5%)            | 21 (13.5%)                 | 15 (6.8%)                 |                      |
| Mixed Ethnicity                                 | 25 (4.0%)                     | 9 (3.6%)             | 7 (4.5%)                   | 9 (4.1%)                  |                      |
| Other                                           | 19 (3.0%)                     | 5 (2.0%)             | 5 (3.2%)                   | 9 (4.1%)                  |                      |
| Hispanic                                        | 14 (2.2%)                     | 4 (1.6%)             | 6 (3.9%)                   | 4 (1.8%)                  |                      |
| Indigenous/Aboriginal/First Nations/Metis/Inuit | 10 (1.8%)                     | 4 (1.6%)             | 2 (1.3%)                   | 4 (1.8%)                  |                      |
| African/Caribbean/Black                         | 6 (1.0%)                      | 4 (1.6%)             | 2 (1.3%)                   | 0 (0%)                    |                      |
| Unknown                                         | 24 (3.9%)                     | 8 (3.2%)             | 7 (4.5%)                   | 9 (4.1%)                  |                      |
| <b>BMI pre- or early pregnancy</b>              |                               |                      |                            |                           |                      |
| Mean ± SD                                       | 24.6 ± 5.2                    | 24.9 ± 5.6           | 25.1 ± 5.6                 | 23.9 ± 4.3                | 0.056                |
| <18.5 (Underweight)                             | 14 (2.2%)                     | 4 (1.6%)             | 3 (1.9%)                   | 7 (3.2%)                  |                      |
| 18.5-24.9 (Normal)                              | 367 (58.9%)                   | 151 (61.1%)          | 89 (57.4%)                 | 127 (57.5%)               |                      |
| 25-29.9 (Overweight)                            | 140 (22.5%)                   | 54 (21.9%)           | 29 (18.7%)                 | 57 (25.8%)                |                      |
| >=30 (Obese)                                    | 71 (11.4%)                    | 31 (12.6%)           | 25 (16.1%)                 | 15 (6.8%)                 |                      |
| Unknown                                         | 31 (5.0%)                     | 7 (2.8%)             | 9 (5.8%)                   | 15 (6.8%)                 |                      |
| <b>Gravidity</b>                                |                               |                      |                            |                           |                      |
| 1                                               | 254 (40.8%)                   | 109 (44.1%)          | 88 (56.8%)                 | 57 (25.8%)                | <0.001               |
| 2                                               | 206 (33.1%)                   | 81 (32.8%)           | 33 (21.3%)                 | 92 (41.6%)                |                      |
| 3+                                              | 161 (25.8%)                   | 57 (23.1%)           | 34 (21.9%)                 | 70 (31.7%)                |                      |
| Unknown                                         | 2 (0.3%)                      | 0 (0%)               | 0 (0%)                     | 2 (0.9%)                  |                      |
| <b>Parity</b>                                   |                               |                      |                            |                           |                      |
| 0                                               | 365 (58.6%)                   | 152 (61.5%)          | 127 (81.9%)                | 86 (38.9%)                | <0.001               |
| 1                                               | 216 (34.7%)                   | 82 (33.2%)           | 22 (14.2%)                 | 112 (50.7%)               |                      |
| 2+                                              | 39 (6.3%)                     | 13 (5.3%)            | 6 (3.9%)                   | 20 (9.0%)                 |                      |
| Unknown                                         | 3 (0.5%)                      | 0 (0%)               | 0 (0%)                     | 3 (1.4%)                  |                      |
| <b>Group B Streptococcus</b>                    |                               |                      |                            |                           |                      |
| Negative                                        | 425 (68.2%)                   | 184 (74.5%)          | 110 (71.0%)                | 131 (59.3%)               | <0.001               |
| Positive                                        | 133 (21.3%)                   | 59 (23.9%)           | 37 (23.9%)                 | 37 (16.7%)                |                      |
| Not tested                                      | 60 (9.6%)                     | 2 (0.8%)             | 7 (4.5%)                   | 51 (23.1%)                |                      |
| Unknown                                         | 5 (0.8%)                      | 2 (0.8%)             | 1 (0.6%)                   | 2 (0.9%)                  |                      |
| <b>Hypertension of pregnancy</b>                |                               |                      |                            |                           |                      |
| No                                              | 557 (89.4%)                   | 222 (89.9%)          | 125 (80.6%)                | 210 (95.0%)               | <0.001               |
| Yes                                             | 65 (10.4%)                    | 25 (10.1%)           | 30 (19.4%)                 | 10 (4.5%)                 |                      |
| Unknown                                         | 1 (0.2%)                      | 0 (0%)               | 0 (0%)                     | 1 (0.5%)                  |                      |

|                                           |                   | <b>(cont.) Mode of Delivery <sup>a</sup></b> |                              |                                    |                                   |                             |
|-------------------------------------------|-------------------|----------------------------------------------|------------------------------|------------------------------------|-----------------------------------|-----------------------------|
|                                           |                   | <b>Total<br/>(n = 623)</b>                   | <b>Vaginal<br/>(n = 247)</b> | <b>Emergency<br/>C/S (n = 155)</b> | <b>Elective<br/>C/S (n = 221)</b> | <b>P value <sup>b</sup></b> |
| <b>Gestational diabetes (GDM)</b>         |                   |                                              |                              |                                    |                                   |                             |
|                                           | No                | 485 (77.8%)                                  | 192 (77.7%)                  | 119 (76.8%)                        | 174 (78.7%)                       | 0.860                       |
|                                           | Yes               | 103 (16.5)                                   | 39 (15.8%)                   | 29 (18.7%)                         | 35 (15.8%)                        |                             |
|                                           | Unknown           | 35 (5.6)                                     | 16 (6.5%)                    | 7 (4.5%)                           | 12 (5.4%)                         |                             |
| <b>Control of GDM</b>                     |                   |                                              |                              |                                    |                                   |                             |
|                                           | Insulin           | 50 (48.5%)                                   | 23 (59.0%)                   | 12 (41.4%)                         | 15(42.9%)                         | 0.278                       |
|                                           | Diet              | 52 (50.5%)                                   | 16 (41.0%)                   | 16 (55.2%)                         | 20 (57.1%)                        |                             |
|                                           | Unknown           | 1 (1.0%)                                     | 0 (0%)                       | 1 (0.3%)                           | 0 (0%)                            |                             |
| <b>Delivery characteristics</b>           |                   |                                              |                              |                                    |                                   |                             |
| <b>Delivery location</b>                  |                   |                                              |                              |                                    |                                   |                             |
|                                           | Hospital          | 602 (96.6%)                                  | 226 (91.5%)                  | 155 (100%)                         | 221 (100%)                        | <b>&lt;0.001</b>            |
|                                           | Home              | 21 (3.4%)                                    | 21 (8.5%)                    | 0 (0%)                             | 0 (0%)                            |                             |
| <b>Intrapartum antibiotics</b>            |                   |                                              |                              |                                    |                                   |                             |
|                                           | No                | 177 (28.4%)                                  | 177 (71.7%)                  | 0 (0%)                             | 0 (0%)                            | <b>&lt;0.001</b>            |
|                                           | Yes               | 446 (71.6%)                                  | 70 (28.3%)                   | 155 (100%)                         | 221 (100%)                        |                             |
| <b>Type of antibiotic <sup>c,d</sup></b>  |                   |                                              |                              |                                    |                                   |                             |
|                                           | Cefazolin         | 387 (86.8%)                                  | 23 (32.9%)                   | 152 (98.1%)                        | 213 (96.4%)                       |                             |
|                                           | Penicillin G      | 84 (18.8%)                                   | 50 (71.4%)                   | 34 (21.9%)                         | 0                                 |                             |
|                                           | Metronidazole     | 38 (8.5%)                                    | 9 (12.9%)                    | 26 (16.8%)                         | 3 (1.4%)                          |                             |
|                                           | Clindamycin       | 10 (2.2%)                                    | 2 (2.9%)                     | 3 (1.9%)                           | 6 (2.7%)                          |                             |
|                                           | Other             | 3 (0.7%)                                     | 2 (2.9%)                     | 1 (0.6%)                           | 0                                 |                             |
|                                           | Unknown           | 5 (1.1%)                                     | 1 (1.5%)                     | 0                                  | 2 (0.9%)                          |                             |
| <b>Chorioamnionitis <sup>e</sup></b>      |                   |                                              |                              |                                    |                                   |                             |
|                                           | No                | 603 (96.8%)                                  | 238 (96.4%)                  | 144 (92.9%)                        | 221 (100%)                        | <b>&lt;0.001</b>            |
|                                           | Yes               | 20 (3.2%)                                    | 9 (3.6%)                     | 11 (7.1%)                          | 0 (0%)                            |                             |
| <b>Duration of ROM</b>                    |                   |                                              |                              |                                    |                                   |                             |
|                                           | <18hrs            | 566 (90.9%)                                  | 221 (89.5%)                  | 124 (80.0%)                        | 221 (100%)                        | <b>&lt;0.001</b>            |
|                                           | >=18hrs           | 37 (5.9%)                                    | 23 (9.3%)                    | 14 (9.0%)                          | 0 (0%)                            |                             |
|                                           | Unknown           | 20 (3.2%)                                    | 3 (1.2%)                     | 17 (11.0%)                         | 0 (0%)                            |                             |
| <b>Number infants delivered</b>           |                   |                                              |                              |                                    |                                   |                             |
|                                           | Singleton         | 614 (98.6%)                                  | 246 (99.6%)                  | 154 (99.4%)                        | 214 (96.8%)                       | <b>0.008</b>                |
|                                           | Twins             | 9 (1.4%)                                     | 1 (0.4%)                     | 1 (0.6%)                           | 7 (3.2%)                          |                             |
| <b>Infant characteristics<br/>(n=632)</b> |                   |                                              |                              |                                    |                                   |                             |
| <b>Sex</b>                                |                   |                                              |                              |                                    |                                   |                             |
|                                           | Female            | 307 (48.6%)                                  | 129 (52.0%)                  | 72 (46.2%)                         | 106 (46.5%)                       | 0.292                       |
|                                           | Male              | 324 (51.3%)                                  | 119 (48.0%)                  | 83 (53.2%)                         | 122 (53.5%)                       |                             |
|                                           | Other             | 1 (0.2%)                                     | 0 (0%)                       | 1 (0.6%)                           | 0 (0%)                            |                             |
| <b>Birth Weight</b>                       |                   |                                              |                              |                                    |                                   |                             |
|                                           | Mean ± SD (g)     | 3450 ± 499                                   | 3445 ± 466                   | 3443 ± 540                         | 3459 ± 507                        | 0.944                       |
| <b>Gestational Age at Birth</b>           |                   |                                              |                              |                                    |                                   |                             |
|                                           | Mean ± SD (weeks) | 39.5 ± 1.2                                   | 39.7 ± 1.3                   | 39.6 ± 1.4                         | 39.1 ± 0.8                        | <b>&lt;0.001</b>            |

<sup>a</sup> C/S; caesarean section

<sup>b</sup> P values from  $\chi^2$  test

<sup>c</sup> Parentheses indicate proportion of 446 participants receiving intrapartum antibiotics

<sup>d</sup> Column totals exceed 100% due to some participants receiving multiple different antibiotics

<sup>e</sup> Including suspected chorioamnionitis diagnosed based on clinical presentation
