# Supplementary material for: Maternal vaginal microbiome composition does not affect development of the infant gut microbiome in early life
Source: PubMed Central journal article supplement (PMC10097898; doi:10.3389/fcimb.2023.1144254), 2023-03-30
Supplement: Table_2.pdf [file Table_2.pdf]

**Supplementary Table S2:** Stability of infant gut microbiomes between 10 days and 3 months of life split by delivery mode. Infant microbiomes were classed as stable if they belonged to clusters sharing the same dominant organism at 10-day and 3-month timepoints (e.g., stable infants dominated by *Bifidobacterium breve* belong to cluster 6 at 10 days and cluster 3 at 3 months). ND indicates no stable microbiomes.

| 10 day stool cluster <sup>a</sup>                              | No. of<br>'stable'<br>microbiomes | Delivery mode   |                  |         |
|----------------------------------------------------------------|-----------------------------------|-----------------|------------------|---------|
|                                                                |                                   | C/S<br>elective | C/S<br>emergency | Vaginal |
| All                                                            | 88/360                            | 27/120          | 20/78            | 41/162  |
| 1 ( <i>Escherichia coli</i> )                                  | 48/96                             | 12/21           | 8/15             | 28/60   |
| 2 ( <i>Klebsiella pneumoniae</i> )                             | 9/38                              | 3/15            | 2/12             | 4/11    |
| 3 ( <i>Bifidobacterium longum</i> subsp. <i>longum</i> )       | 6/47                              | 1/6             | 3/8              | 2/33    |
| 4 ( <i>Klebsiella michiganensis</i> )                          | 5/29                              | 2/18            | 3/8              | 0/3     |
| 5 ( <i>Streptococcus parasanguinis</i> )                       | 3/25                              | 2/14            | 1/7              | 0/4     |
| 6 ( <i>Bifidobacterium breve</i> )                             | 2/16                              | 1/7             | 0/3              | 1/6     |
| 7 ( <i>Klebsiella variicola</i> )                              | 5/16                              | 3/5             | 2/7              | 0/4     |
| 8 ( <i>Citrobacter youngae</i> )                               | 3/4                               | 1/2             | ND               | 2/2     |
| 9 ( <i>Parabacteroides distasonis</i> )                        | 4/10                              | ND              | 1/2              | 3/8     |
| 10 ( <i>E. coli</i> , <i>B. breve</i> , <i>P. distasonis</i> ) | 0/15                              | 0/3             | ND               | 0/12    |
| 11 ( <i>Streptococcus salivarius</i> )                         | 0/10                              | 0/5             | 0/1              | 0/4     |
| 12 ( <i>Rothia mucilaginoso</i> )                              | 0/9                               | 0/6             | 0/1              | 0/2     |
| 13 ( <i>Serratia nematodophila</i> )                           | 0/2                               | 0/1             | 0/1              | ND      |
| 14 ( <i>Klebsiella aerogenes</i> )                             | 0/2                               | ND              | 0/2              | ND      |
| 15 ( <i>Clostridium boltae</i> )                               | 0/3                               | ND              | 0/1              | 0/2     |
| 16 ( <i>Klebsiella grimontii</i> )                             | 0/5                               | 0/2             | 0/1              | 0/2     |
| 17 ( <i>Haemophilus parainfluenzae</i> )                       | 0/6                               | 0/5             | 0/1              | ND      |
| 18 ( <i>Bifidobacterium longum</i> subsp. <i>infantis</i> )    | 1/2                               | ND              | ND               | 1/2     |
| 19 ( <i>Megasphaera micronuciformis</i> )                      | 0/4                               | 0/1             | 0/1              | 0/2     |
| 20 ( <i>Kosakonia oryzendophytica</i> )                        | 0/3                               | 0/1             | 0/1              | 0/1     |
| 21 ( <i>Escherichia hermanii</i> )                             | 0/2                               | 0/1             | 0/1              | ND      |
| 22 ( <i>Bifidobacterium dentium</i> )                          | 0/5                               | 0/3             | 0/1              | 0/1     |
| 24 ( <i>Klebsiella oxytoca</i> )                               | 0/3                               | ND              | 0/1              | 0/2     |
| 25 ( <i>Citrobacter freundii</i> )                             | 2/8                               | 2/4             | 0/3              | 0/1     |

<sup>a</sup> Excluding 82 infants whose microbiome profile at 10 days belonged to cluster 23 (various species)
